# Supplementary material for: Novel analytical approaches for the study of mobility and relaxation phenomena in positional isomers of GABA
Source: Royal Society of Chemistry journal article supplement (doi:10.1039/c3cp52670d), 2013-01-01
Supplement: c3cp52670d.pdf [file c3cp52670d.pdf]

## SUPPLEMENTARY INFORMATION

### **Novel analytical approaches for the study of mobility and relaxation phenomena in positional isomers of GABA**

**Samuel K Owusu-Ware, Babur Z. Chowdhry, Stephen A. Leharne and Milan D. Antonijevic\***

*School of Science, Faculty of Engineering and Science, University of Greenwich (Medway Campus), Chatham Maritime, Kent ME4 4TB, UK. E-mail: M.Antonijevic@greenwich.ac.uk; Fax +44(0)-208-331-9805; Tel +44(0)-208-331-9841*

#### **Hot-stage Microscopy (HSM) Data for GABA and its Positional Isomers**

HSM methodology: HSM images of the aminobutyric acids were obtained using a Mettler Toledo hot-stage attached to a Leica microscope equipped with a camera. The footages were taken at x10 magnification. During the analysis samples were heated at 5°C/min from ambient temperature to 350°C.

DL-AABA (Fig. 1) undergoes complete sublimation when heated from ambient temperature to 350°C. The particle size of the sample decreases but it does not melt. The clarity of the images decrease at around 240°C and by 250°C no particles are observed.

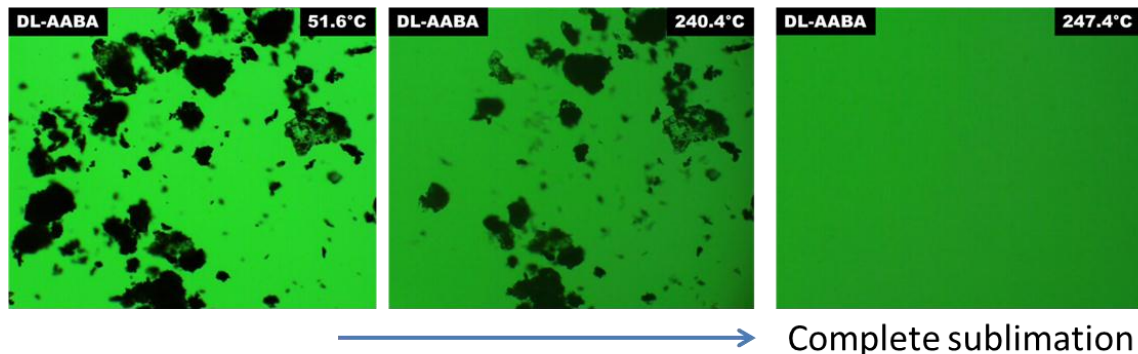

**Fig. 1. HSM data for DL-AABA.**

In the case of DL-BABA (Fig. 2) the samples melt at ~190°C followed by the first decomposition characterised by the discolouration of the melt, followed by the second decomposition process which causes the discoloured residue to get darker.

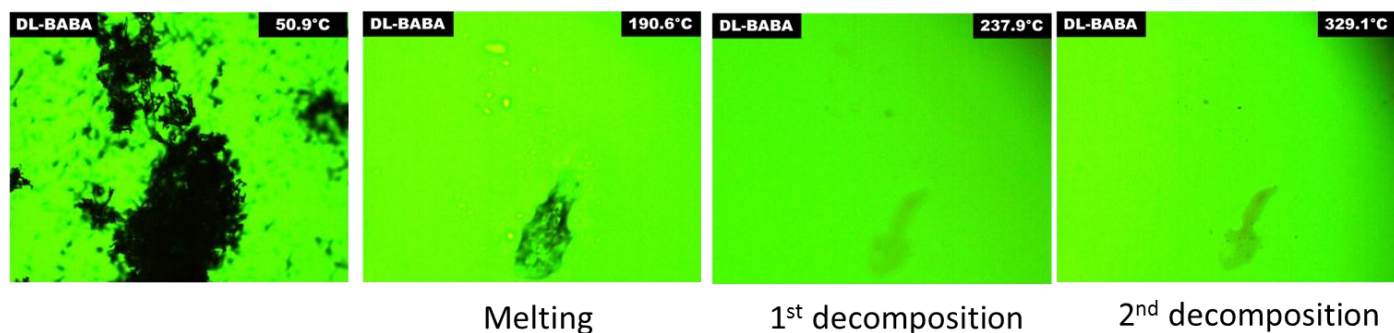

**Fig. 2. HSM data for DL-BABA.**

GABA (Fig. 3) undergoes a melt-decomposition process (verified by DSC analysis). As observed by HSM the sample melts at  $\sim 212^{\circ}\text{C}$  and then decomposes leaving a black residue on the slide.

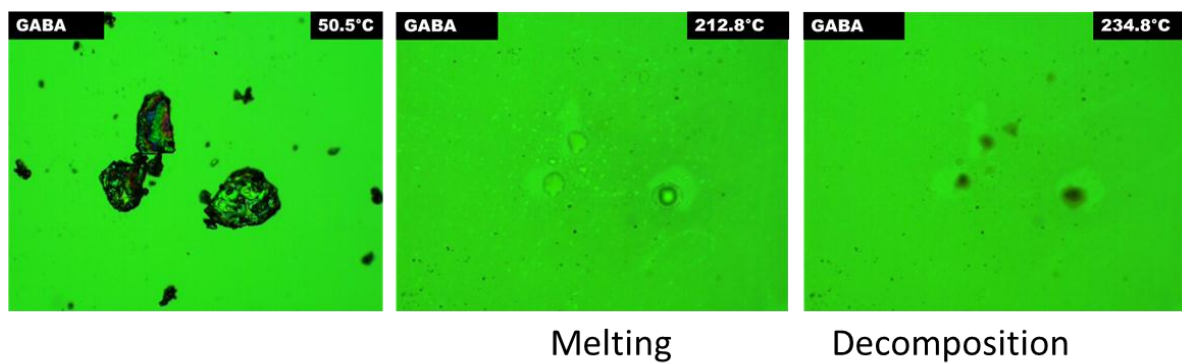

**Fig. 3. HSM data for GABA.**
